# Supplementary material for: The large Maf factor Traffic Jam controls gonad morphogenesis in Drosophila
Source: Springer Nature journal article supplement (doi:10.1038/ncb1058), 2003-10-26
Supplement: 41556_2003_BFncb1058_MOESM1_ESM.pdf [file 41556_2003_BFncb1058_MOESM1_ESM.pdf]

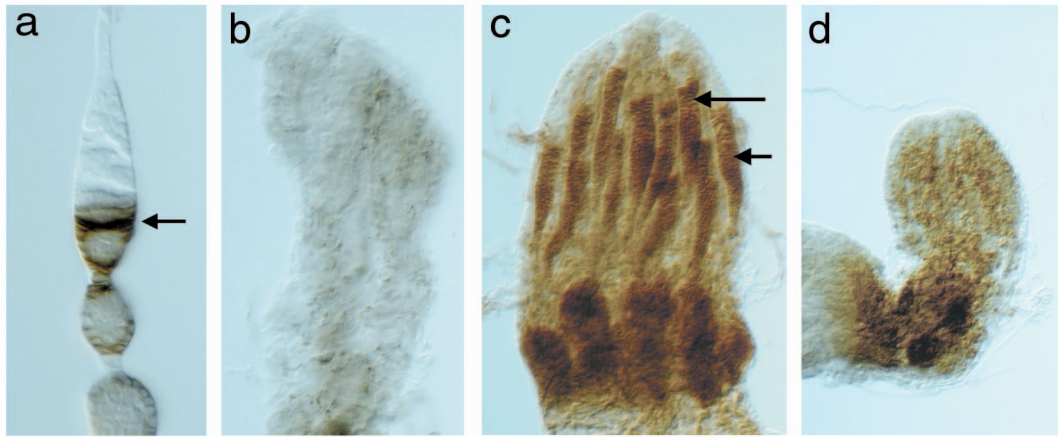

**Figure S1** No follicle cells were detected in adult ovaries of *tj* mutants. **(a)** Early follicle cells in the germarium of a wild-type ovariole are strongly marked by Fas3 (arrow). **(b)** The whole *tj<sup>eo2</sup>* mutant ovary lacks strong Fas3 staining, suggesting that follicle cells are missing. Weak staining is due to

the expression of Fas3 in epithelial sheaths that surround each ovariole (epithelial sheaths were removed in **a**). **(c)** Early follicle cells, stained with Fas3, form long stalks (arrows) in *osk<sup>301</sup>* mutant ovaries that lack germ cells. **(d)** Follicle cell stalks are missing in *tj<sup>eo2</sup> osk<sup>301</sup>* double mutants.
